# Supplementary material for: A DNA Prime Immuno-Potentiates a Modified Live Vaccine against the Porcine Reproductive and Respiratory Syndrome Virus but Does Not Improve Heterologous Protection
Source: MDPI journal article supplement (doi:10.3390/v11060576), 2019-06-25
Supplement: s1 [file s1]

**GP4GP5M chimera**

H- MAATILFLLAGAQHFMVSEA -OH  
H- LAGAQHFMVSEAFACKPCFS -OH  
H- VSEAFACKPCFSTHLSDIKT -OH  
H- PCFSTHLSDIKTNTTAAAGF -OH  
H- DIKTNTTAAAGFMVLQNINC -OH  
H- AAGFMVLQNINCPQFHRAST -OH  
H- NINCPQFHRASTTSSSPLRK -OH  
H- RASTTSSSPLRKSPQCREAV -OH  
H- PLRKSPQCREAVGTPQYITI -OH  
H- REAVGTPQYITIVANVTDES -OH  
H- YITIVANVTDESILYNADLL -OH  
H- TDESILYNADLLMLSACLFY -OH  
H- ADLLMLSACLFYASEMSEKG -OH  
H- CLFYASEMSEKGFKVIFGNF -OH  
H- SEKGFKVIFGNFADGNGDSS -OH  
H- FGNFADGNGDSSTYQYIYNL -OH  
H- GDSSTYQYIYNLTICELNGT -OH  
H- IYNLTICELNGTAWLSDKFY -OH  
H- LNGTAWLSDKFYWAVAIRAA -OH  
H- DKFYWAVAIRAAKNCMACRY -OH  
H- IRAAKNCMACRYARTRFTNF -OH  
H- ACRYARTRFTNFIVDDRGGV -OH  
H- FTNFIVDDRGGVHRWKSPIV -OH  
H- RGGVHRWKSPIVVEKLGKAE -OH  
H- SPIVVEKLGKAEVGDALVTI -OH  
H- GKAEVGDALVTIKHVIEGV -OH  
H- LVTIKHVIEGVKAQPLTRT -OH  
H- IEGVKAQPLTRTTAEQWQAA -OH  
H- LTRTTAEQWQAAGLDDFCYD -OH  
H- WQAAGLDDFCYDSTAVQKLS -OH  
H- FCYDSTAVQKLSRCRLCCLG -OH  
H- QKLSRCRLCCLGRRYILAPA -OH  
H- CCLGRRYILAPAHHVESAAG -OH  
H- LAPAHHVESAAGLHPIPASG -OH  
H- SAAGLHPIPASGNQAYAVRK -OH  
H- PASGNQAYAVRKPLTSVNG -OH  
H- AVRKPLTSVNGTLVPGLRG -OH  
H- SVNGTLVPGLRGLVLGGKRA -OH  
H- GLRGLVLGGKRAVKRGMVNL -OH  
H- VLGGKRAVKRGMVNLVKYGR -OH

**Nucleoprotein N**

H- MAGKTQRQNRNKNPAPMGNG -OH  
H- NRNKNPAPMGNGQSVNQLCQ -OH  
H- MGNGQSVNQLCQLLGSMILKS -OH  
H- QLCQLLGSMILKSQRQQSRGG -OH  
H- MLKSQRQQSRGGQVKKKKPE -OH  
H- SRGGQVKKKKPEKPHFPLAA -OH  
H- KKPEKPHFPLAAEDDVRHHL -OH  
H- PLAAEDDVRHHLTQAERSLC -OH  
H- RHHLTQAERSLCLQSIQTAF -OH  
H- RSLCLQSIQTAFNQAGTAS -OH  
H- QTAFNQAGTASLSSSGKVG -OH  
H- GTASLSSSGKVGQVEFMLP -OH  
H- GKVGFQVEFMLPVTHTVRLI -OH  
H- FMLPVTHTVRLIRVTSTSAS -OH  
H- VTHTVRLIRVTSTSASQGVN -OH

**NSP1 $\beta$** 

H- MSGTFSRCMCTPAARVFWNA -OH  
H- MCTPAARVFWNAGQVYCTRC -OH  
H- FWNAGQVYCTRCLSARSLLP -OH  
H- CTRCLSARSLLPLELQDDDL -OH  
H- SLLPLELQDDDLGAIGLFHK -OH  
H- DDDLGAIGLFHKPKDKLRWR -OH  
H- LFHKPKDKLRWRVPVGIPLV -OH

H- LRWRVPVGIPLVECSPSGCC -OH  
H- IPLVECSPSGCCWLSAIFPL -OH  
H- SGCCWLSAIFPLARMTSGNH -OH  
H- IFPLARMTSGNHNFLQRLVK -OH  
H- SGNHNFLQRLVKVAEVLRYD -OH  
H- RLVKVAEVLRYDGCCLTPRHL -OH  
H- LYRDGCCLTPRHLRELQVYER -OH  
H- PRHLRELQVYERGCDWYPIT -OH  
H- VYERGCDWYPITGPVPGMGM -OH  
H- YPITGPVPGMGMYANSMHVS -OH  
H- GMGMYANSMHVSDRPFPGAT -OH  
H- MHVSDRPFPGATHVLNLSPL -OH  
H- PGATHVLNLSPLPQQACRQP -OH  
H- NSPLPQQACRQPCPFEEAH -OH  
H- CRQPCPFEEAHSDVYKWK -OH  
H- EEAHSDVYKWKVFIFTDSS -OH  
H- KWKKFVIFTDSSPNGRSRMM -OH  
H- TDSSPNGRSRMMWMPESGDS -OH  
H- SRMMWMPESGDSANLEELPL -OH  
H- SGDSANLEELPLELERQVEI -OH  
H- ELPLELERQVEILVRSFPAH -OH  
H- QVEILVRSFPAHHPVDLADW -OH  
H- FPAHHPVDLADWELTESPEH -OH  
H- LADWELTESPEHGFSFGTSH -OH  
H- SPEHGFSFGTSHHCGYLAQH -OH  
H- GTSHHCGYLAQHPYGFDGKC -OH  
H- LAQHPYGFDGKCWLSCLDL -OH  
H- DGKCWLSCLDLSTKVL RHE -OH  
H- FLDLSTKVL RHEEYLA SFG -OH  
H- LRHEEYLA SFGYQTRWGVP -OH  
H- SAFGYQTRWGVP GKYLQRR -OH  
H- WGVPGKYLQRR LQINGVR -OH  
H- QRR LQINGVR VDPDGP -OH  
H- VR VDPDGP -OH  
H- GPIHVEALSCPQSWIRHLTL -OH  
H- SCPQSWIRHLTLDDDATPGF -OH  
H- HLT LDDDATPGFVRLMSLRI -OH  
H- TPGFVRLMSLRIIPNTEPTT -OH  
H- SLRIIPNTEPTTLQIFRFGT -OH  
H- IPNTEPTTLQIFRFGTHKWY -OH

#### **RdRp pool1**

H- MATGFKLLAASGLTRCGRGG -OH  
H- AASGLTRCGRGGLVVTETAV -OH  
H- GRGGLVVTETAVKIVKYHSR -OH  
H- ETAVKIVKYHSRTFTLGPLD -OH  
H- YHSRTFTLGPLDLKVTSEVE -OH  
H- GPLDLKVTSEVEVKKSTEQG -OH  
H- SEVEVKKSTEQGHAVVANLC -OH  
H- TEQGHAVVANLC SGVVMRP -OH  
H- ANLC SGVVMRPHPPSLVDV -OH  
H- LMRPHPPSLVDVILKPGLDT -OH  
H- LVDVILKPGLDTTPGIQPGH -OH  
H- GLDTTPGIQPGHAGNMGV D -OH  
H- QPGHAGNMGV DGTIWD FET -OH  
H- MGV DGTIWD FETAPTRAELE -OH  
H- DFETAPTRAELELSKQIIQA -OH  
H- AELELSKQIIQACEIRR GDA -OH  
H- IIQACEIRRGDAPNLQLPYK -OH  
H- RGDAPNLQLPYKLYPVRGDP -OH  
H- LPYKLYPVRGDPERKEGR LI -OH  
H- RGDPERKEGR LINTRFGDLP -OH  
H- GRLINTRFGDLPYKTPQDTG -OH  
H- GDLPYKTPQDTGSAIHAACC -OH  
H- QDTGSAIHAACCLNPNGAPV -OH  
H- AACCLNPNGAPVSDGKSVLG -OH

H- GAPVSDGKSVLGTTLQHGFE -OH  
H- SVLGTTLQHGFEYVPTVPY -OH  
H- HGFELYVPTVPYSVMEYLD -OH  
H- TVPYSVMEYLDSPDTPMC -OH  
H- YLDSRPDTPLMCTKHGTSRA -OH  
H- PLMCTKHGTSRAATEDLQKY -OH  
H- TSRAATEDLQKYDLSTQGFV -OH  
H- LQKYDLSTQGFVLPGLRLV -OH  
H- QGFVLPGLRLVRRFIFGHI -OH  
H- LRLVRRFIFGHIGKAPPLFL -OH  
H- FGHIGKAPPLFLPSTYPAKN -OH  
H- PLFLPSTYPAKNMAGINGQ -OH  
H- PAKNSMAGINGQRFPTKDVQ -OH  
H- INGQRFPTKDVQSIPEVDEM -OH  
H- KDVQSIPEVDEMCARAVKEN -OH  
H- VDEMCARAVKENWQTVTPCT -OH

#### **RdRp pool2**

H- VKENWQTVTPCTLKKQYCSK -OH  
H- TPCTLKKQYCSKPKTRTILG -OH  
H- YCSKPKTRTILGTNNFIALA -OH  
H- TILGTNNFIALAHRSAISGV -OH  
H- IALAHRSAISGVTQAFMKKA -OH  
H- LSGVTQAFMKKAWRSPIALG -OH  
H- MKKAWRSPIALGKNKFELH -OH  
H- IALGKNKFELHCTVAGRCL -OH  
H- KELHCTVAGRCLADLASCD -OH  
H- GRCLEADLASCDRSTPAIVR -OH  
H- ASCDRSTPAIVRWFTAHLLY -OH  
H- AIVRWFTAHLLYELAGCEEY -OH  
H- HLLYELAGCEEYLPYVNLN -OH  
H- CEEYLPYVNLNCHDLVATQ -OH  
H- VLNCHDLVATQDGAFTKRG -OH  
H- VATQDGAFTKRGGLSSGDPV -OH  
H- TKRGGLSSGDPVTSVSNVY -OH  
H- GDPVTSVSNVYSLIYAQH -OH  
H- NTVYSLIYAQHMVLSALKM -OH  
H- YAQHMVLSALKMGHEIGLKF -OH  
H- ALKMGHEIGLKFLEDQLKFE -OH  
H- GLKFLEDQLKFEDLLEIQPM -OH  
H- LKFEDLLEIQPMLVYDDL -OH  
H- IQPMLVYDDLVLVYAEQPTF -OH  
H- DDLVLVYAEQPTFPNYHWWVE -OH  
H- QPTFPNYHWWVEHLDLMLGF -OH  
H- WWVEHLDLMLGFKTDPKKTV -OH  
H- MLGFKTDPKKTVITDKPSFL -OH  
H- KKTVITDKPSFLGCKIEAGR -OH  
H- PSFLGCKIEAGRQLVPSNRDR -OH  
H- EAGRQLVPSNRDRILAALAYH -OH  
H- NRDRILAALAYHMKQAQNA -OH  
H- LAYHMKQAQNAEYASAAAI -OH  
H- NAEYASAAAILMDSACI -OH  
H- AAAILMDSACIDYDPEWYE -OH  
H- CACIDYDPEWYEDLICGIAR -OH  
H- EWYEDLICGIARCARQDGYS -OH  
H- GIARCARQDGYSFPGPPFFM -OH  
H- DGYSFPGPPFFMSMWERLKS -OH  
H- SFGPPFFMSMWERLKSHNE -OH

#### **Control peptide**

H- IKDFHVFYFRESRDALWKGPG -OH
