# Supplementary material for: A DNA Prime Immuno-Potentiates a Modified Live Vaccine against the Porcine Reproductive and Respiratory Syndrome Virus but Does Not Improve Heterologous Protection
Source: MDPI journal article supplement (doi:10.3390/v11060576), 2019-06-25
Supplement: s1 [file s1]

## Sera

## Nasal secretions

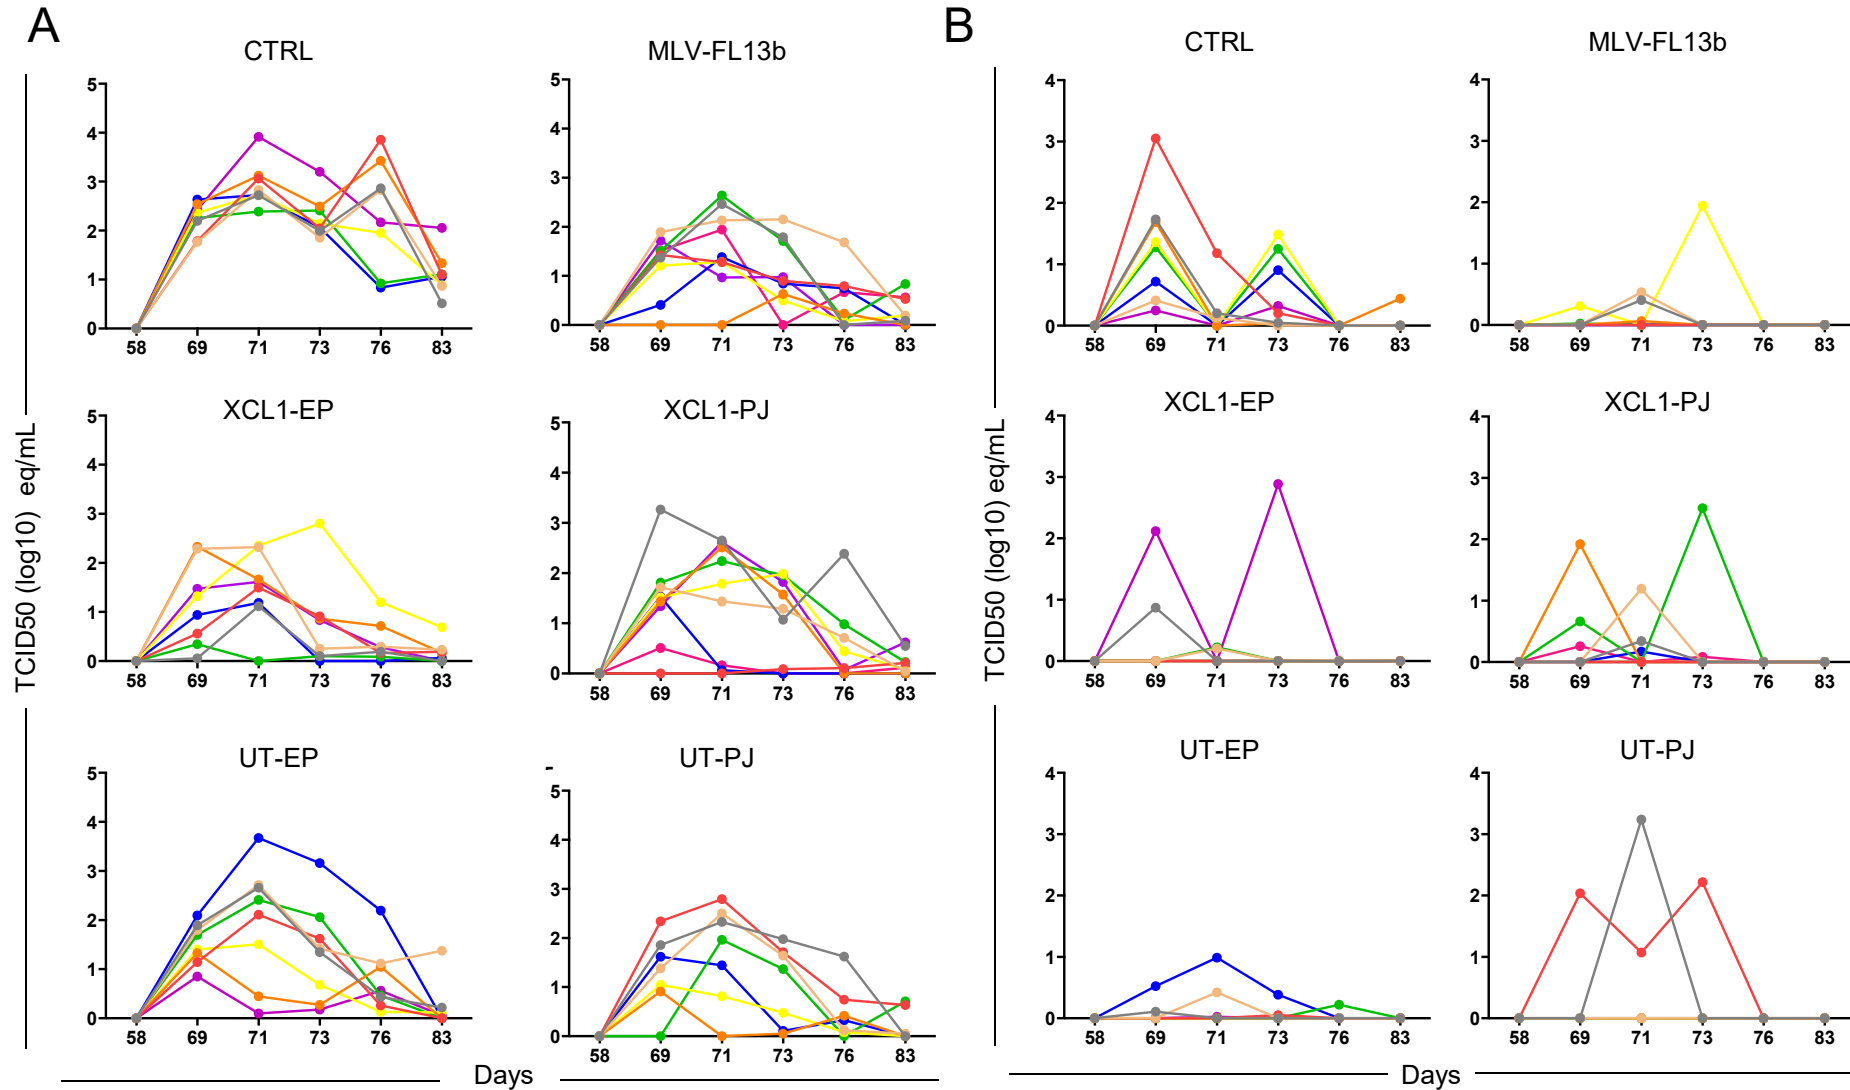

**Supplementary figure 2**

**Detection over time of FL07 RNA in serum (A) and nasal secretions (B) of unvaccinated, MLV-13b and DNA+MLV-FL13b vaccinated pigs.** The vaccinated pigs were subjected to FL07 challenge on D63 and the FL07 virus was selectively detected in sera and nasal swab fluids with specific qRT-PCR on D58, 69, 71, 73, 76 and 83. The TCID<sub>50</sub>eq (log<sub>10</sub>)/ml are indicated at each time point for each pig of the 6 groups. The limit of detection is calculated as being 0.2 TCID<sub>50</sub>eq/ml.

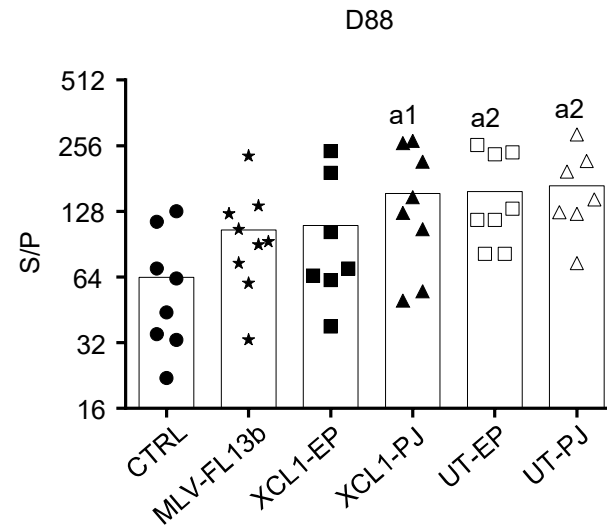

### Supplementary figure 3

**Effect of the FL07 heterologous challenge on anti-Env Abs in MLV-FL13b and DNA+MLV vaccinated pigs.** Sera collected at D88 were analyzed at a 1:20 dilution with the ELISA-Env. Statistically significant differences between 2 groups were calculated using the Mann Whitney non-parametric test. Number 1 corresponds to  $p < 0.05$ , 2 to  $p < 0.01$ .
